# Supplementary material for: Perancangan Bodi Mobil Anak-Anak Menggunakan Bahan Fiber Composite
Source: Royal Society of Chemistry journal article supplement (doi:10.1039/d2cp01574a), 2000-01-01
Supplement: d2cp01574a1.pdf [file d2cp01574a1.pdf]

## *Supplementary Information*

# Theoretical Perspective for the Relationship Between Structures and Luminescent Properties of Red Thermally Activated Delayed Fluorescence Molecules

Huanling Liu<sup>1</sup>, Kai Zhang<sup>1</sup>, Haipei Zou<sup>1</sup>, Qingfang Mu<sup>1</sup>, Xiaorui, Wang<sup>1</sup>, Yuzhi  
Song<sup>1</sup>, Lili Lin<sup>1</sup>, Chuan-Kui Wang<sup>1\*</sup>, Jianzhong Fan<sup>1, 2\*</sup>

1. Shandong Province Key Laboratory of Medical Physics and Image Processing Technology, Institute of Materials and Clean Energy, School of Physics and Electronics, Shandong Normal University, Jinan 250014, China.
2. Guangdong Provincial Key Laboratory of Luminescence from Molecular Aggregates (South China University of Technology), Guangzhou 510640, China.

\*Author to whom correspondence should be addressed.

E-mail: [fanjianzhongvip@163.com](mailto:fanjianzhongvip@163.com) and [ckwang@sdu.edu.cn](mailto:ckwang@sdu.edu.cn)

***Calculation details for TBCT and TSCT ratios:***

Firstly, the non-relaxation part of charge transfer (CT) can be obtained by analyzing the hole-electron distribution when molecule is excited. CT ratio with this concept can be analyzed by IFCT method, based on the following equation:

$$Q_{R,S} = \Theta_{R,hole} \Theta_{S,ele}$$

Here,  $Q_{R,S}$  represents the charge transfer quantity from part R to part S,  $\Theta_{R,hole}$  means the excited electron amount occupied by R part,  $\Theta_{S,ele}$  is the arrived electron amount occupied by S part. Then pure amount of electron transfer can be calculated by following formula:

$$p_{S \rightarrow R} = Q_{S,R} - Q_{R,S}$$
$$\Delta p_R = \sum_{s \neq R} Q_{S,R} - Q_{R,S}$$

Where,  $p_{S \rightarrow R}$  represents the pure amount of electron transfer of two parts,  $\Delta p_R$  is the charge variation of one part. Based on these functions, the charge transfer ratio can be calculated quantitatively. Among these, the direct CT ratio between D-A can be regarded as through-space CT, the CT ratios of D- $\pi$  and  $\pi$ -A are regard as through-bond CT.

However, if there is no spatial overlap between holes and electrons in one molecule, the transition is forbidden although with large charge transfer. In other words, this part of charge transfer does not contribute to the absorption or emission. So, what we concerned about is that the CT transition which can contribute to emission and absorption. To solve this

issue, we analyze the transition density by the following function:

$$\rho_{TB} = \rho_{tot} - \rho_{TS}$$

Here,  $\rho_{tot}$  means the transition density integral of the whole molecule, and  $\rho_{TS}$  represents the transition density integral of the molecule with deleted  $\pi$  bridge,  $\rho_{TB}$  is then obtained.

Secondly, following the abovementioned method, we should define the donor part, acceptor part and bridge part. Taking the studied BTDMac-NAI as example (as shown in Figure S1), the atom number of the donor, acceptor and bridge should be determined initially. Atom numbers of 34, 39, 72-82 are classified as donor, 1-30, 49-61 as acceptor and 31-33, 35-38, 40-48, 62-71 as bridge. Then, we implement the program script provided by Cheng Zhong carried out by Multiwfn in Linux system. After that, we can get the TSCT and TBCT ratios and corresponding results are shown in Figure S2.

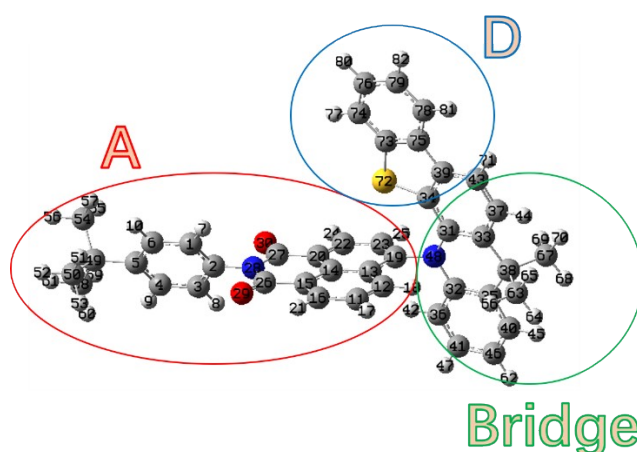

Figure S1. Atom numbers of the donor part, acceptor part and bridge part for studied molecule BTDMac-NAI.

```
TS/TB using transition density:
Through Space CT: 0.17078      68.90%
Through Bond CT: 0.07706      31.09%
Tot transit dens: 0.24784
```

Figure S2. Calculation results for BTDMAc-NAI in toluene of  $S_1$  state performed by Multiwfn.

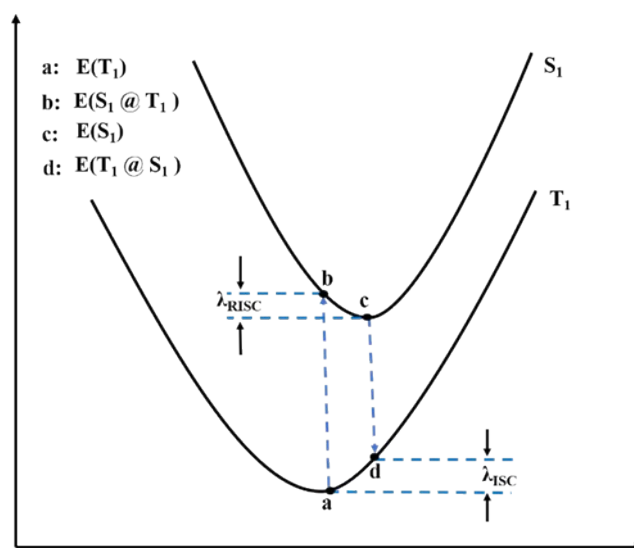

Figure S3. Schematic representation of the adiabatic potential energy surfaces for  $S_1$  and  $T_1$ .

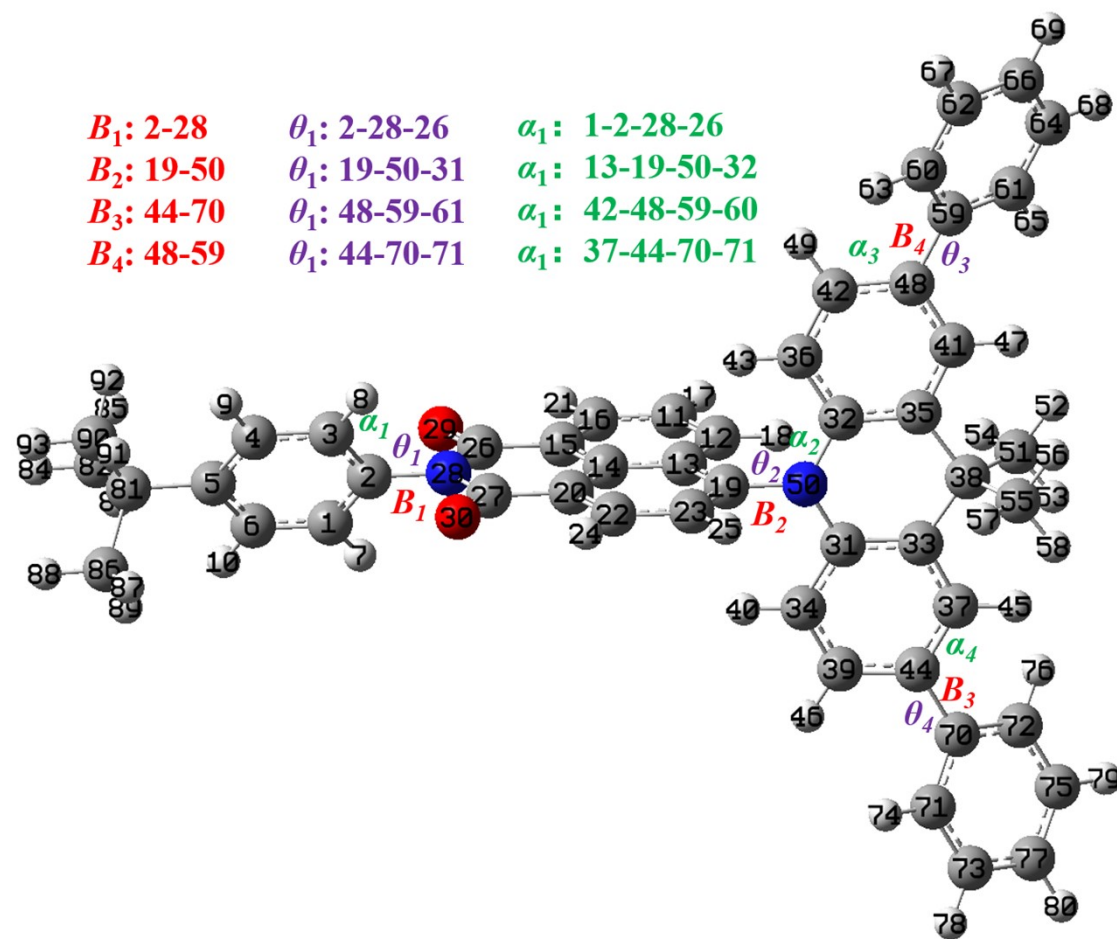

**Figure S4.** The atomic labels and the interesting bond lengths ( $B_1$ ,  $B_2$ ,  $B_3$  and  $B_4$ ), bond angles ( $\theta_1$ ,  $\theta_2$ ,  $\theta_3$  and  $\theta_4$ ) and the dihedral angles ( $\alpha_1$ ,  $\alpha_2$ ,  $\alpha_3$  and  $\alpha_4$ ) of NAI-R2.

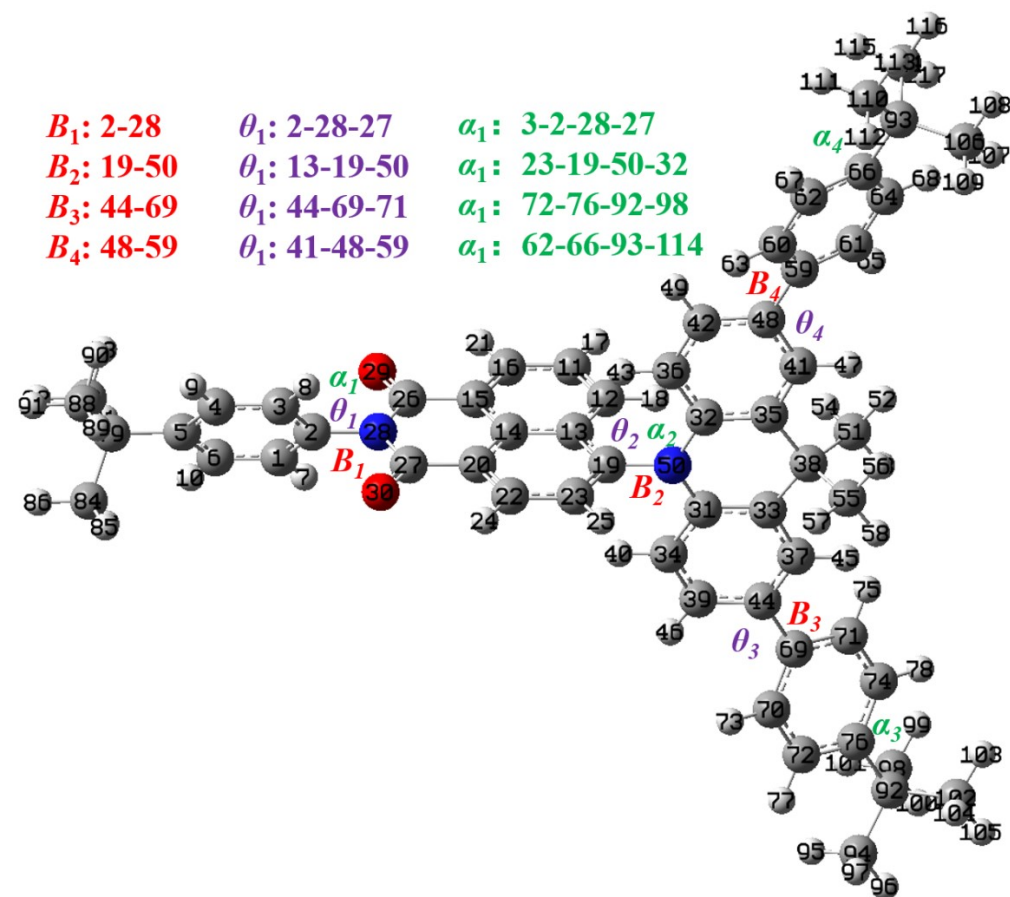

**Figure S5.** The atomic labels and the interesting bond lengths ( $B_1$ ,  $B_2$ ,  $B_3$  and  $B_4$ ), bond angles ( $\theta_1$ ,  $\theta_2$ ,  $\theta_3$  and  $\theta_4$ ) and the dihedral angles ( $\alpha_1$ ,  $\alpha_2$ ,  $\alpha_3$  and  $\alpha_4$ ) of NAI-R3.

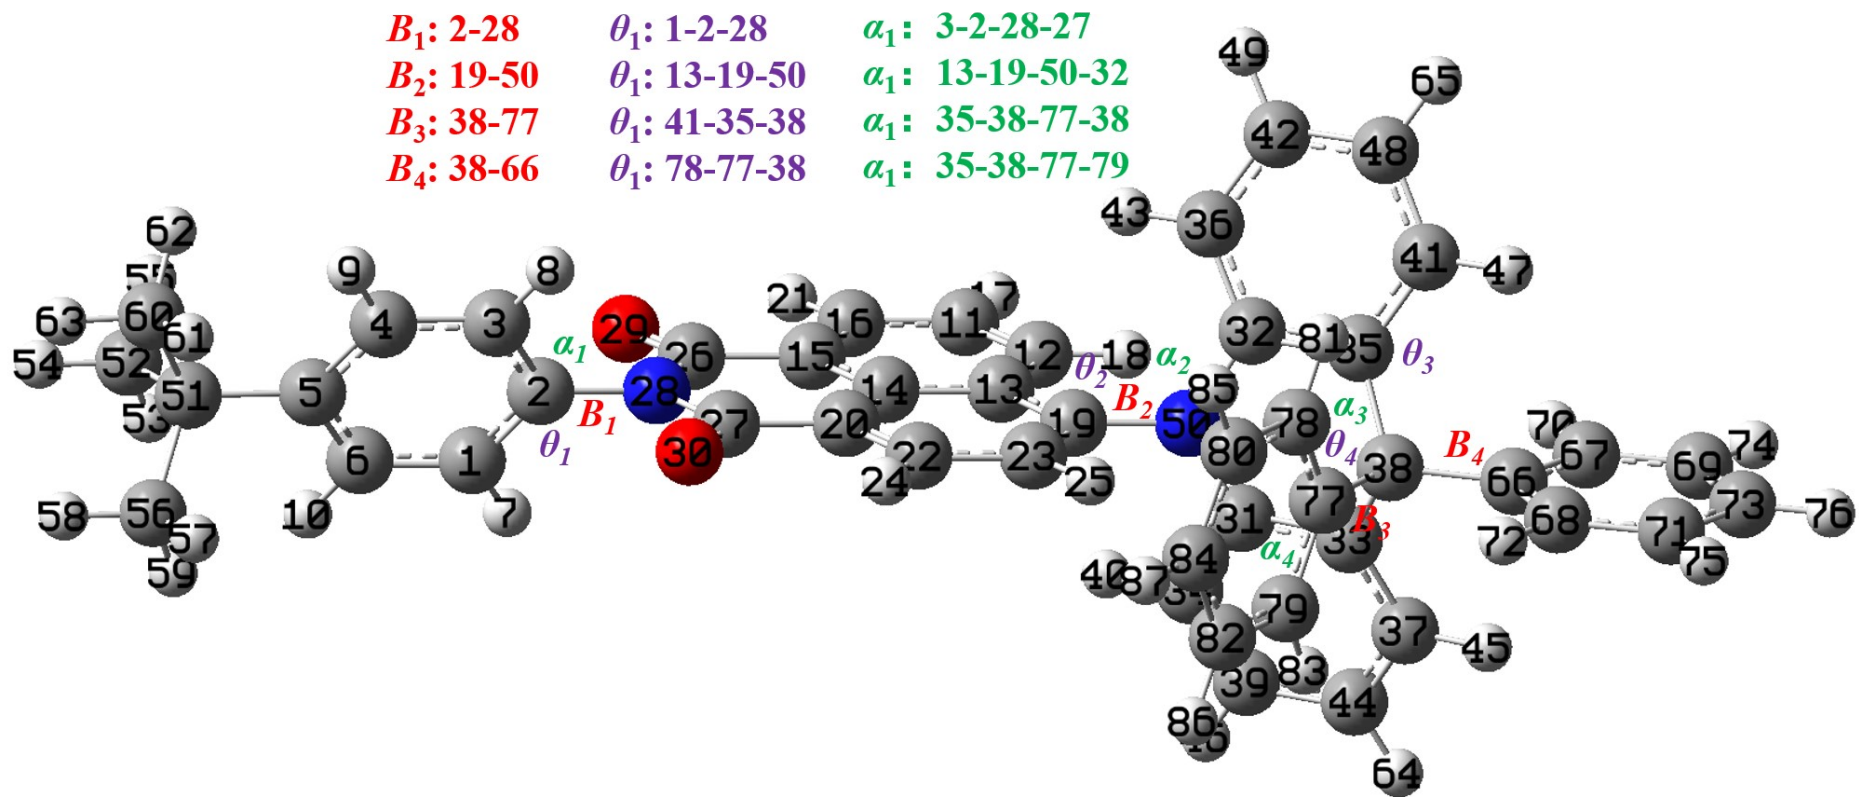

**Figure S6.** The atomic labels and the interesting bond lengths ( $B_1$ ,  $B_2$ ,  $B_3$  and  $B_4$ ), bond angles ( $\theta_1$ ,  $\theta_2$ ,  $\theta_3$  and  $\theta_4$ ) and the dihedral angles ( $\alpha_1$ ,  $\alpha_2$ ,  $\alpha_3$  and  $\alpha_4$ ) of NAI-DPAC.

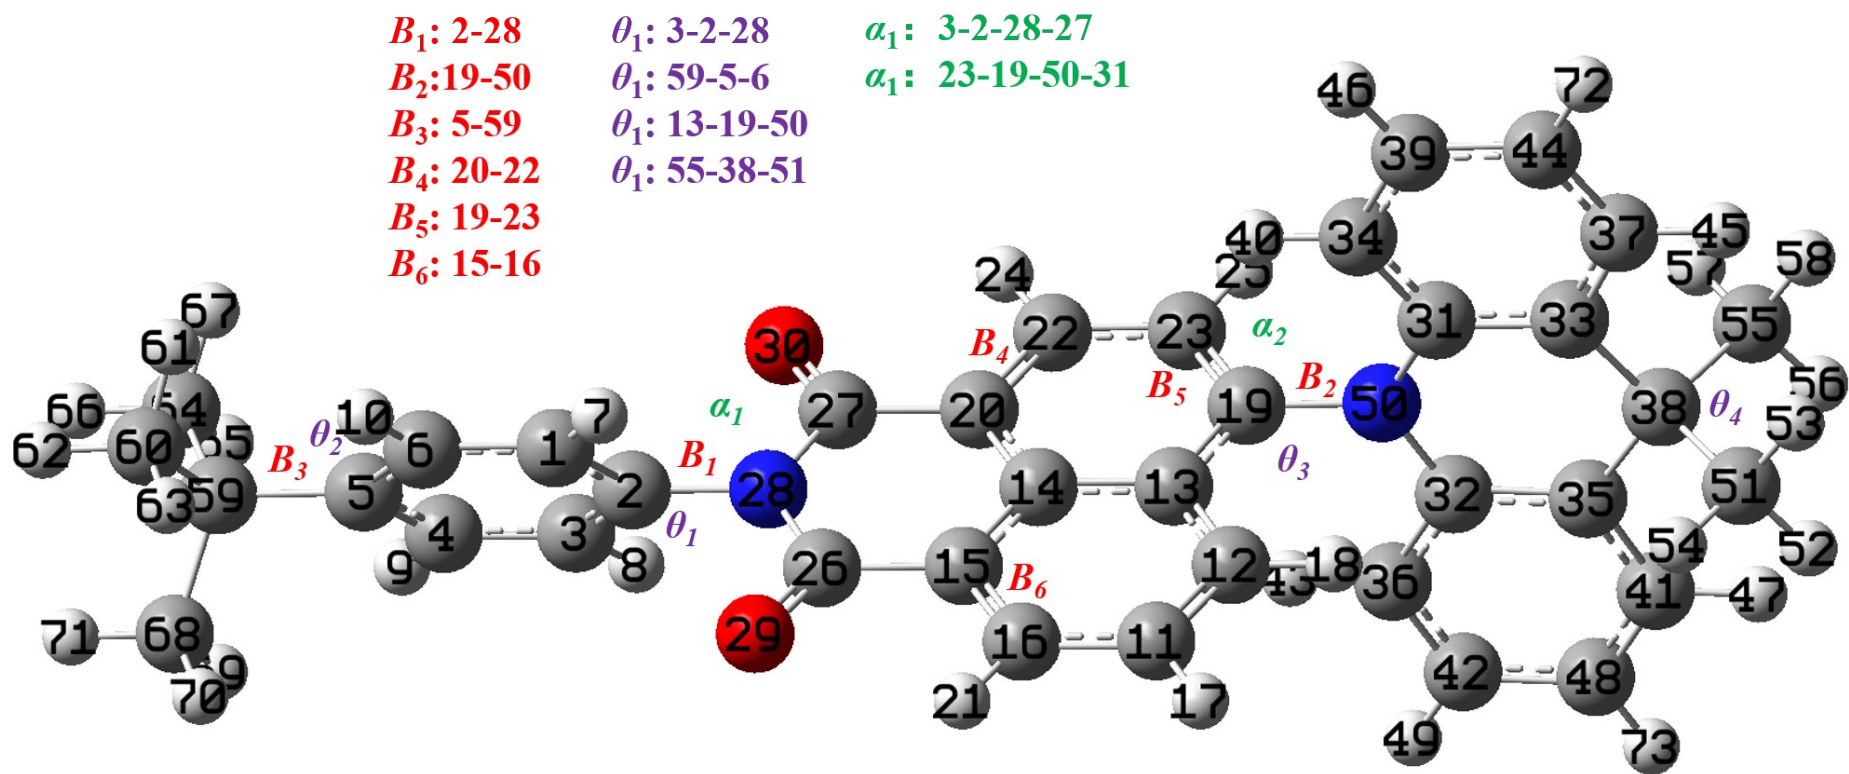

**Figure S7.** The atomic labels and the interesting bond lengths ( $B_1$ ,  $B_2$ ,  $B_3$ ,  $B_4$ ,  $B_5$  and  $B_6$ ), bond angles ( $\theta_1$ ,  $\theta_2$ ,  $\theta_3$  and  $\theta_4$ ) and the dihedral angles ( $\alpha_1$  and  $\alpha_2$ ) of NAI-DMAC.



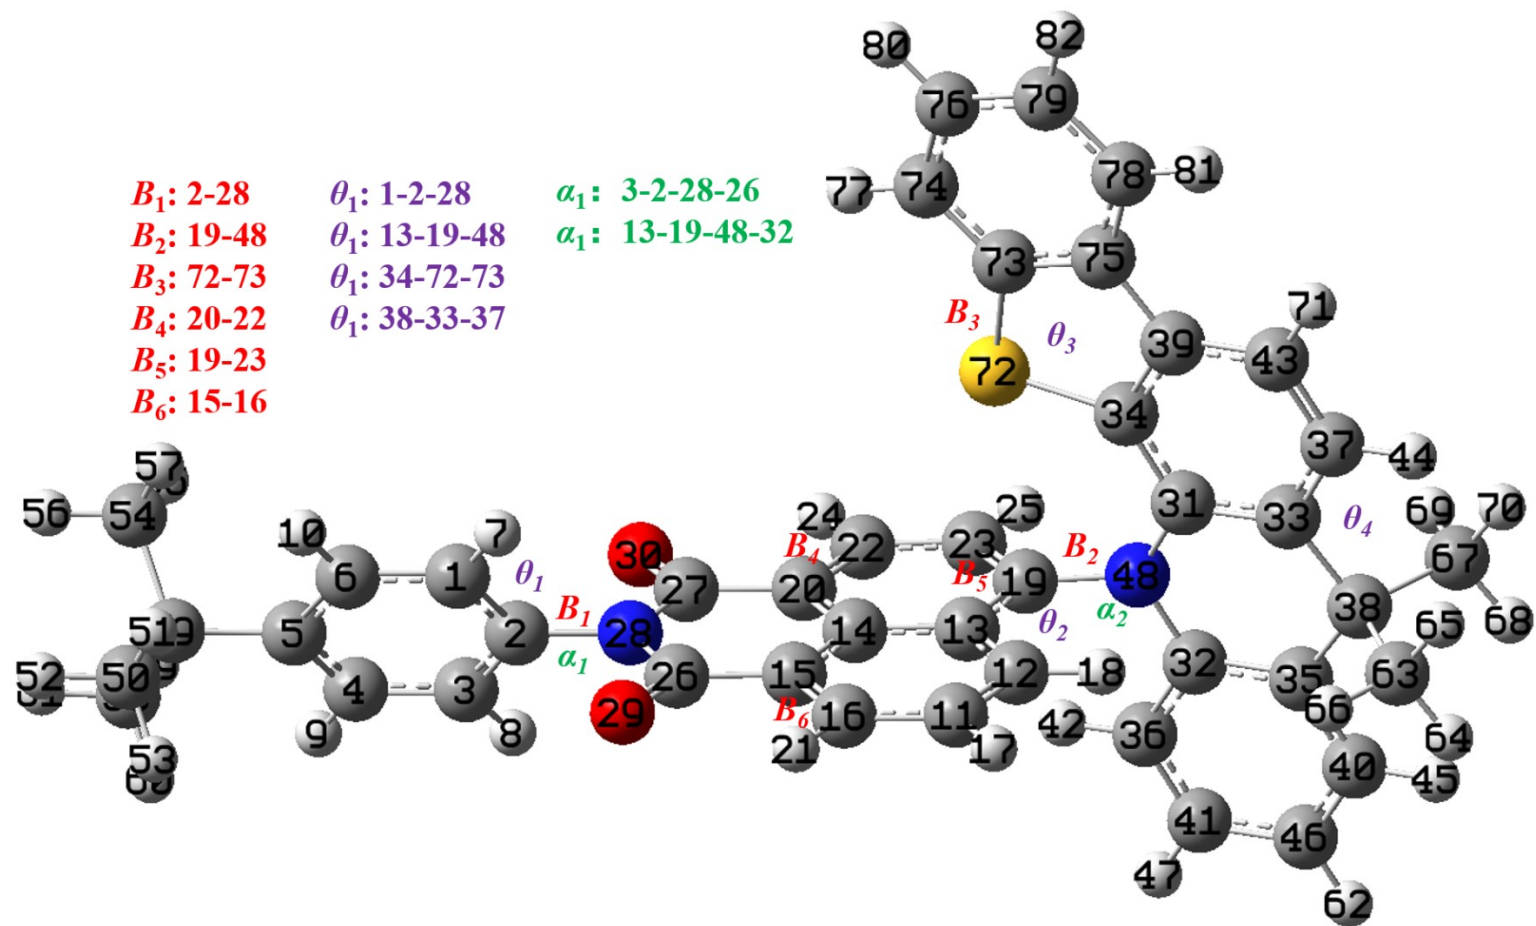

**Figure S8.** The atomic labels and the interesting bond lengths ( $B_1$ ,  $B_2$ ,  $B_3$ ,  $B_4$ ,  $B_5$  and  $B_6$ ), bond angles ( $\theta_1$ ,  $\theta_2$ ,  $\theta_3$  and  $\theta_4$ ) and the dihedral angles ( $\alpha_1$  and  $\alpha_2$ ) of BTDMAc-NAI.

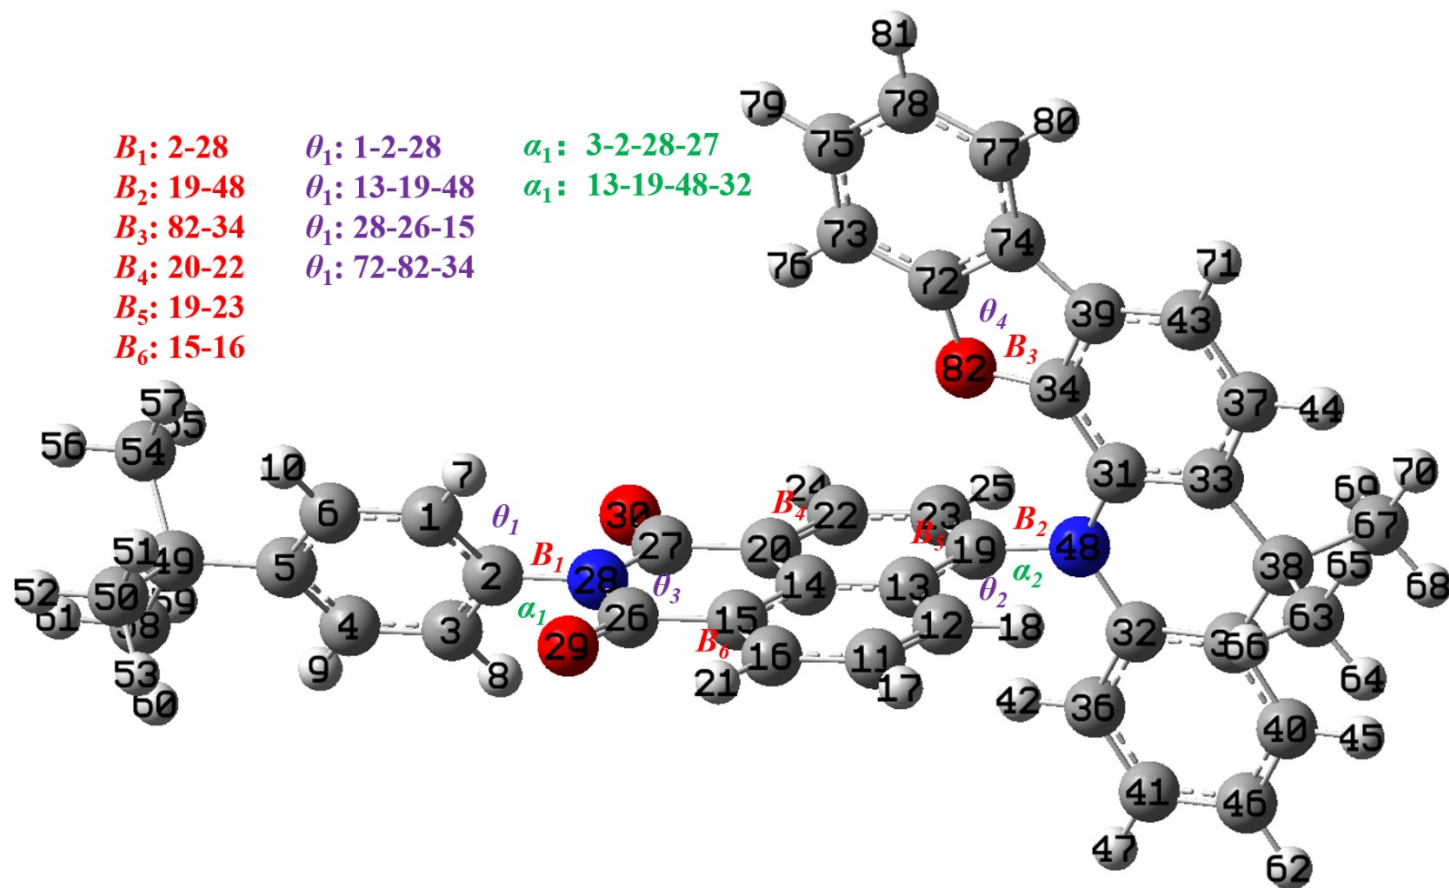

**Figure S9.** The atomic labels and the interesting bond lengths ( $B_1$ ,  $B_2$ ,  $B_3$ ,  $B_4$ ,  $B_5$  and  $B_6$ ), bond angles ( $\theta_1$ ,  $\theta_2$ ,  $\theta_3$  and  $\theta_4$ ) and the dihedral angles ( $\alpha_1$  and  $\alpha_2$ ) of BFDMAc-NAI.

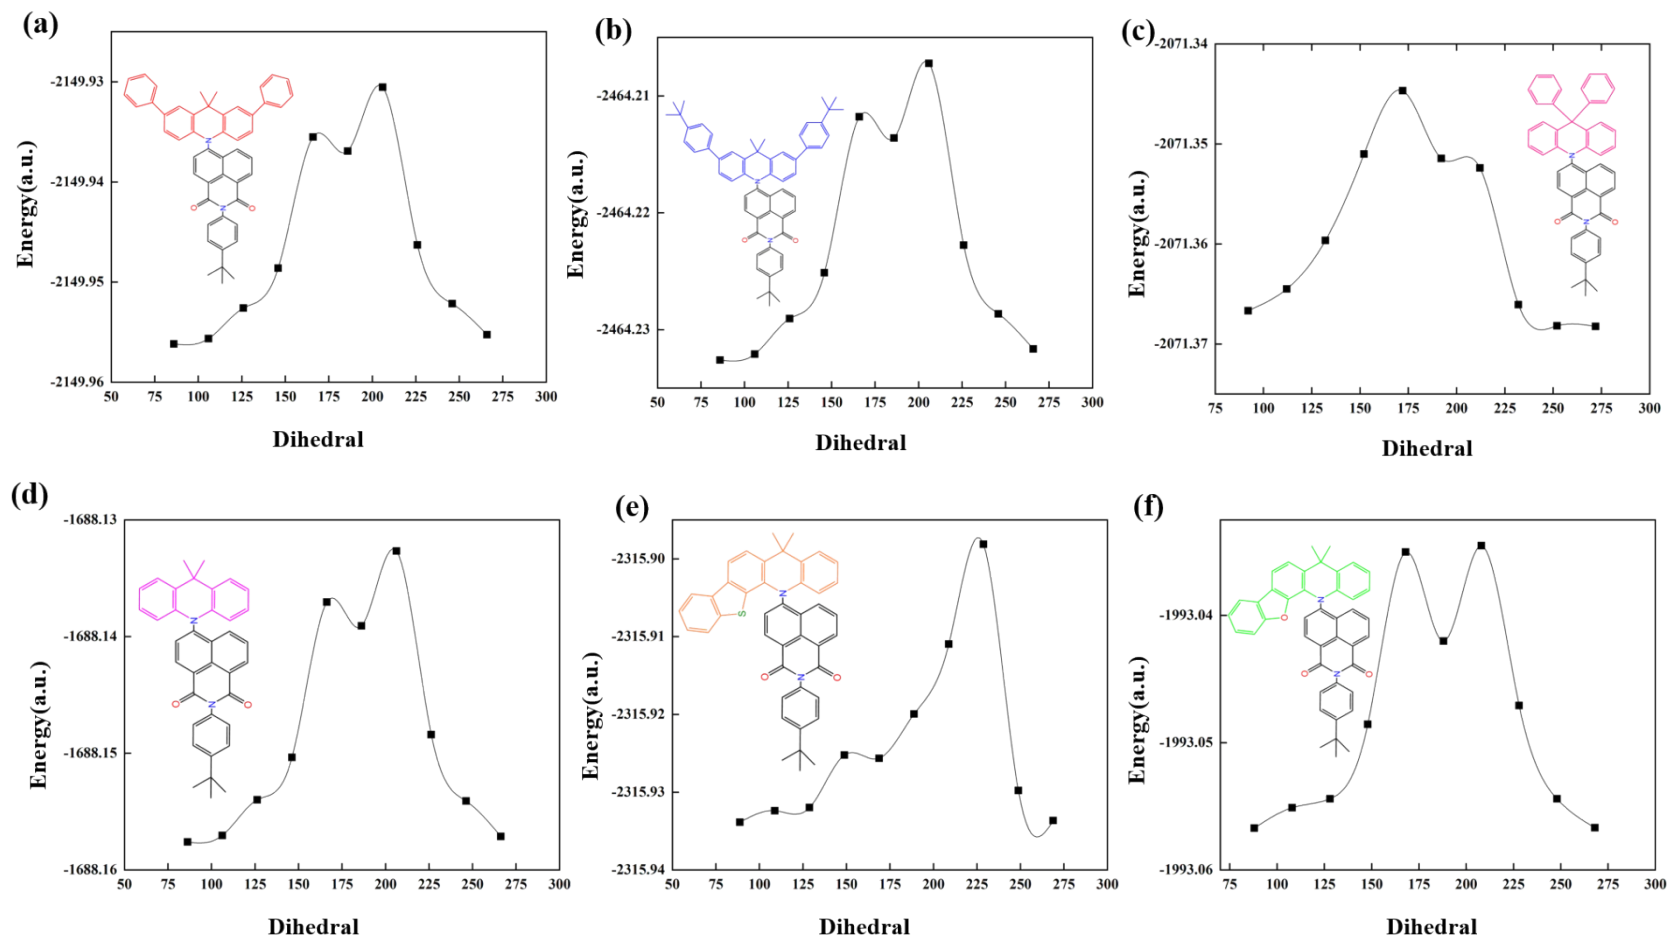

**Figure S10.** Potential energy curves of ground states for six molecules.

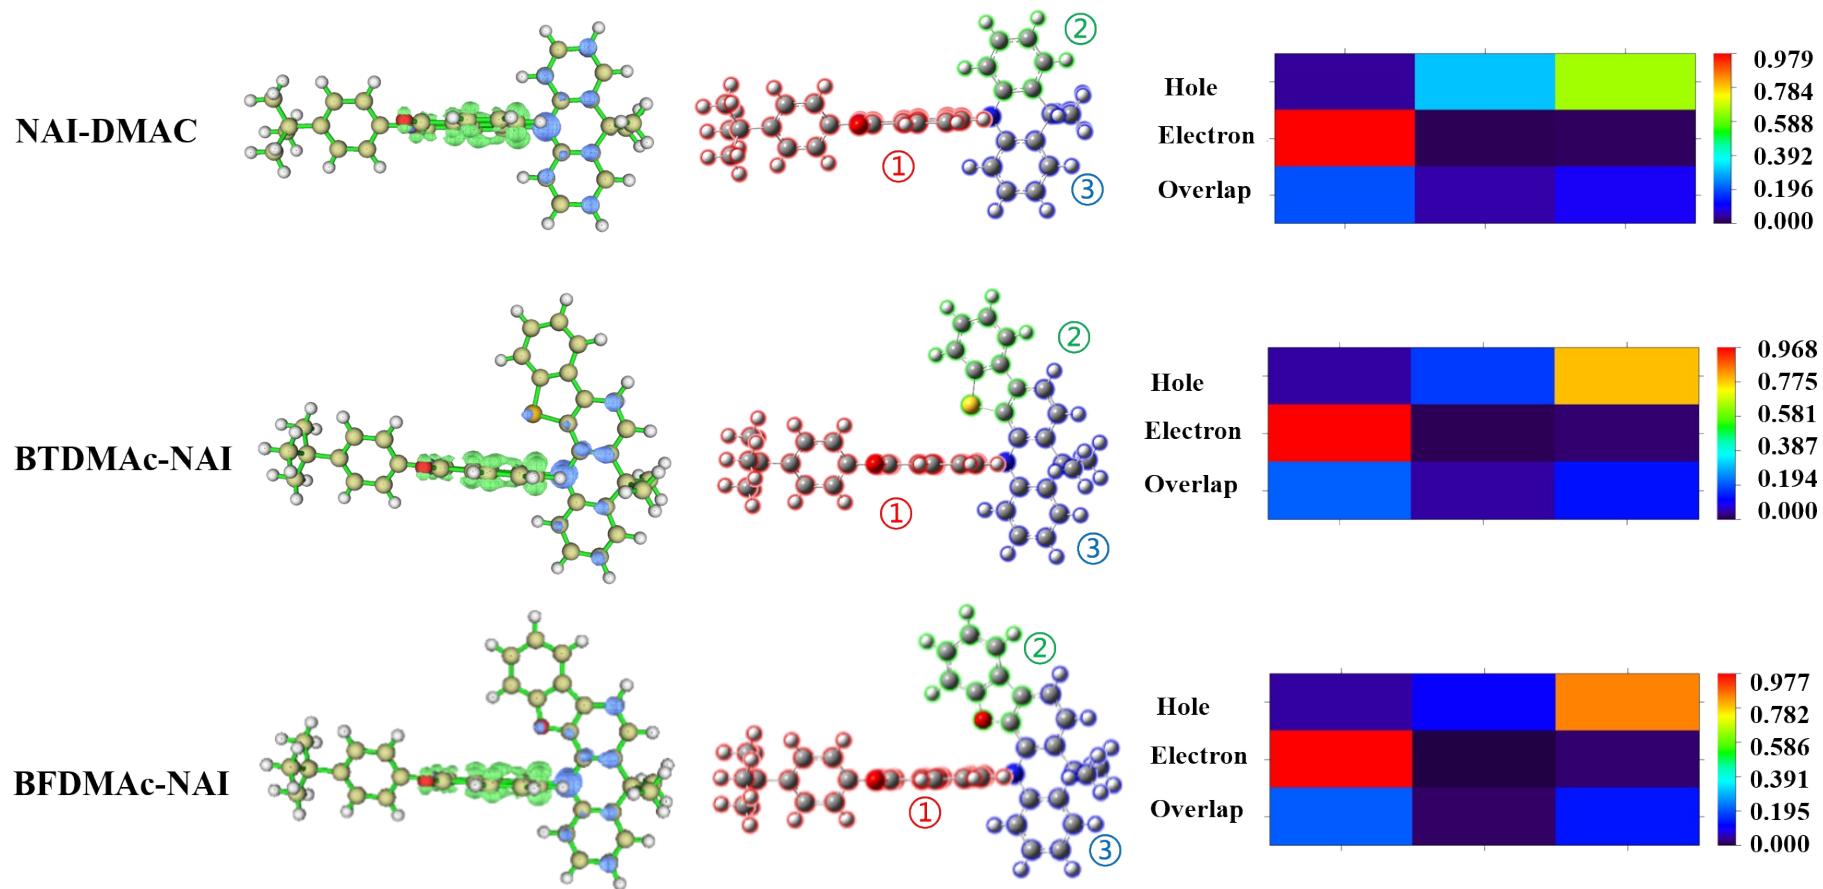

**Figure S11.** Distributions of holes and electrons and heat maps of  $S_1$  state for NAI-DMAC, BTDMac-NAI and BFDMac-NAI in toluene.

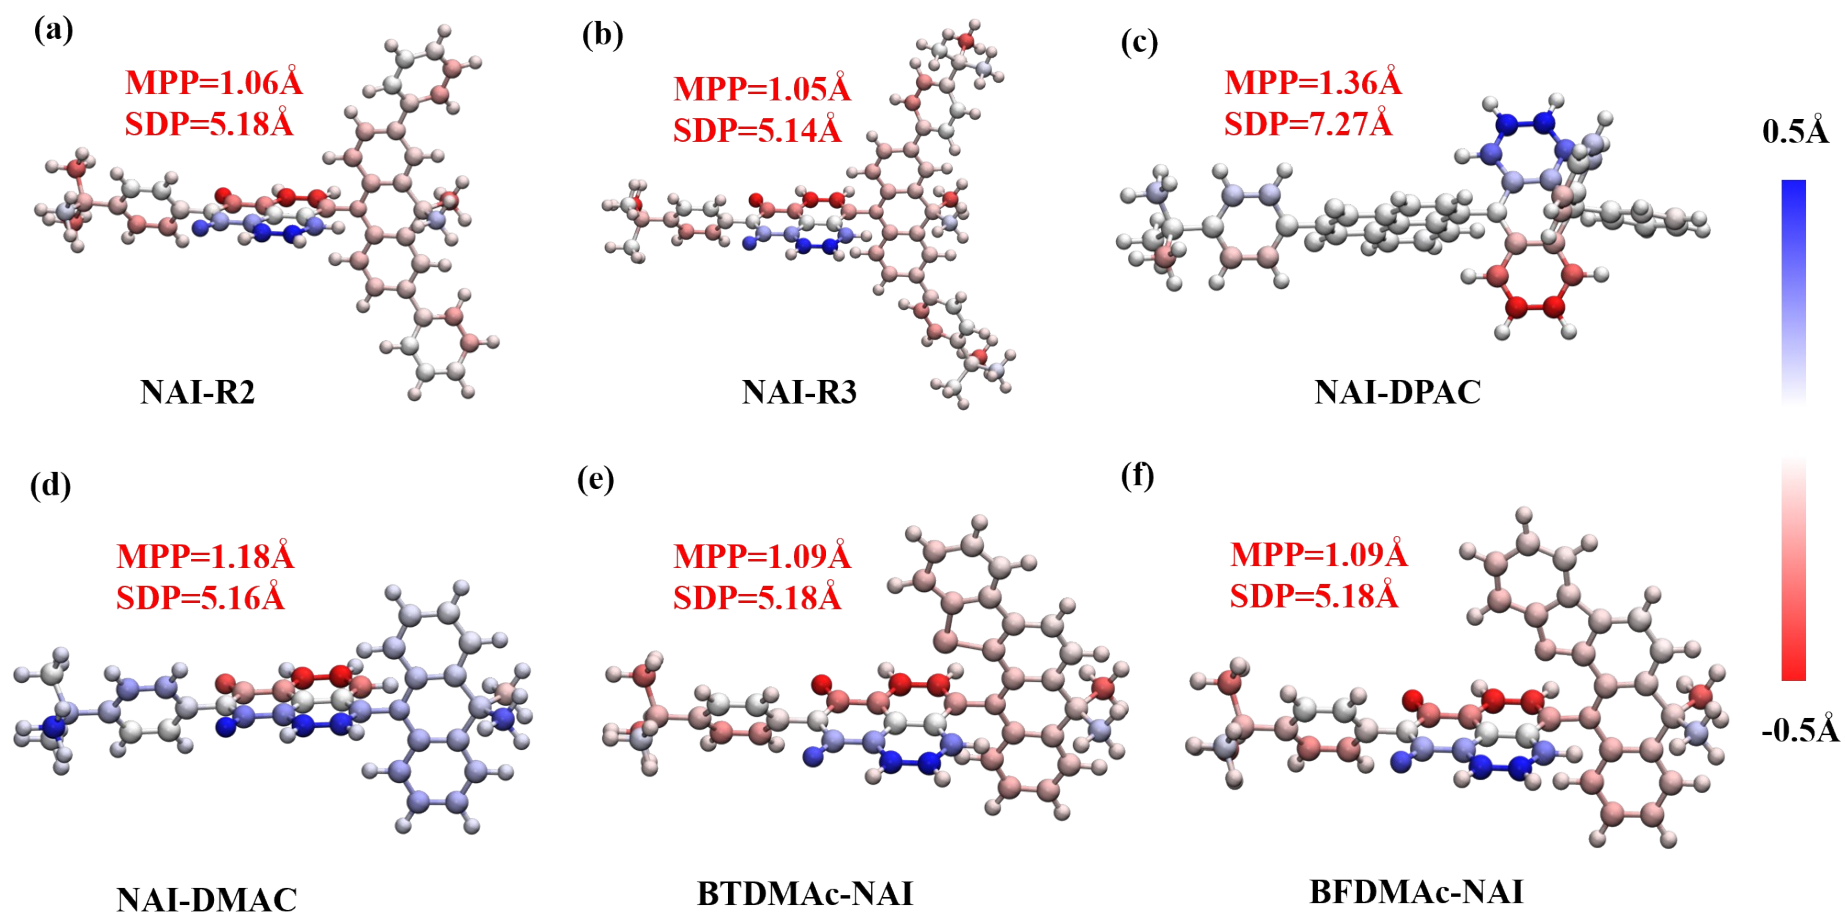

**Figure S12.** The planarity analysis of the six molecules based on S1 state.

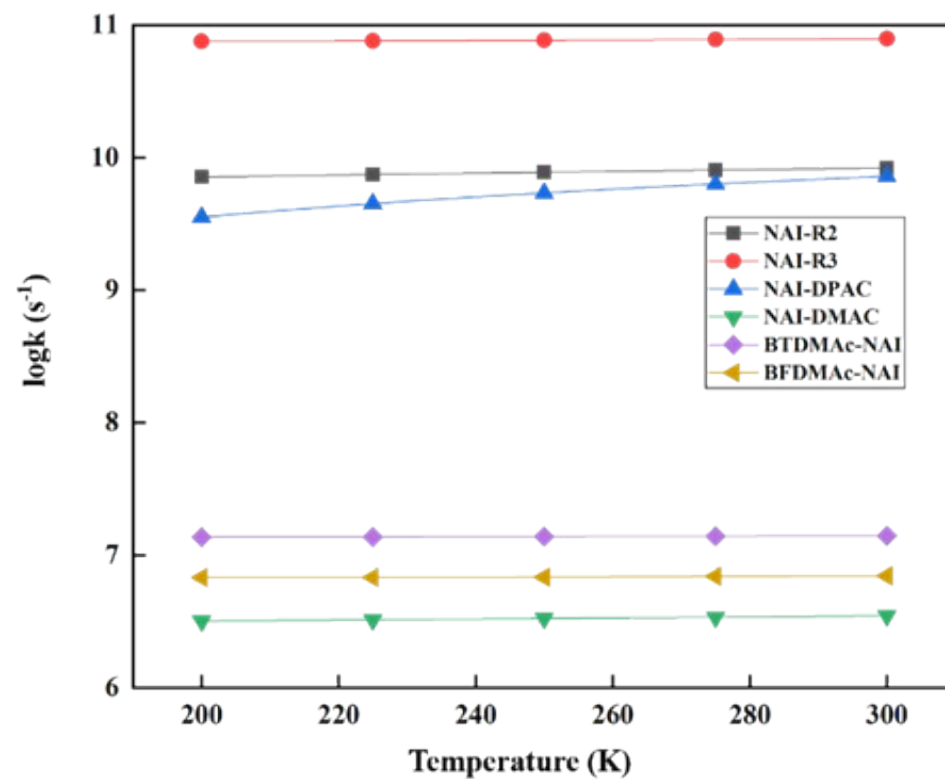

**Figure S13.** Variations of the  $k_{nr}$  with temperatures for NAI-R2, NAI-R3, NAI-DPAC, NAI-DMAC, BTDMAc-NAI and BFDMAc-NAI in toluene.

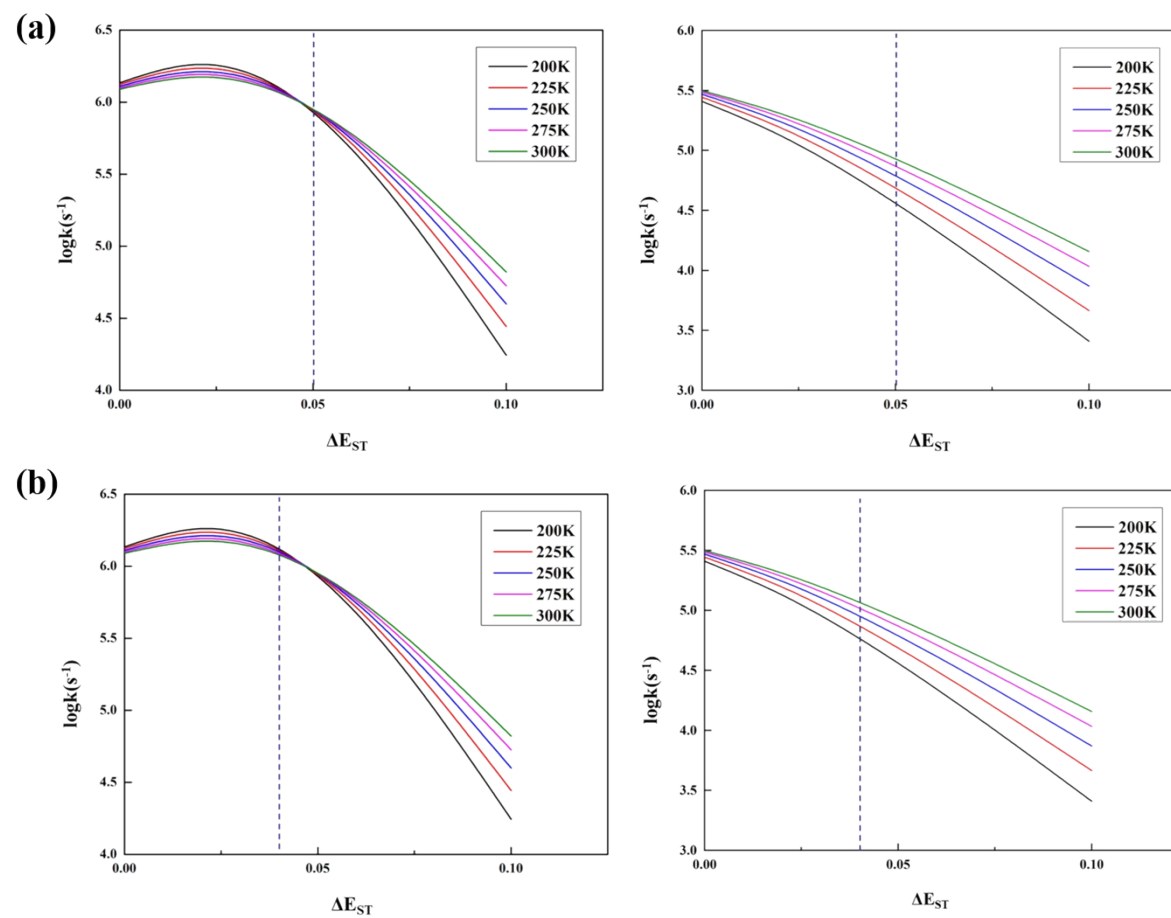

**Figure S14.** ISC rate constants and RISC rate constants as a function of the energy gap for NAI-R2 (a) and NAI-R3 (b) of different temperature in toluene.

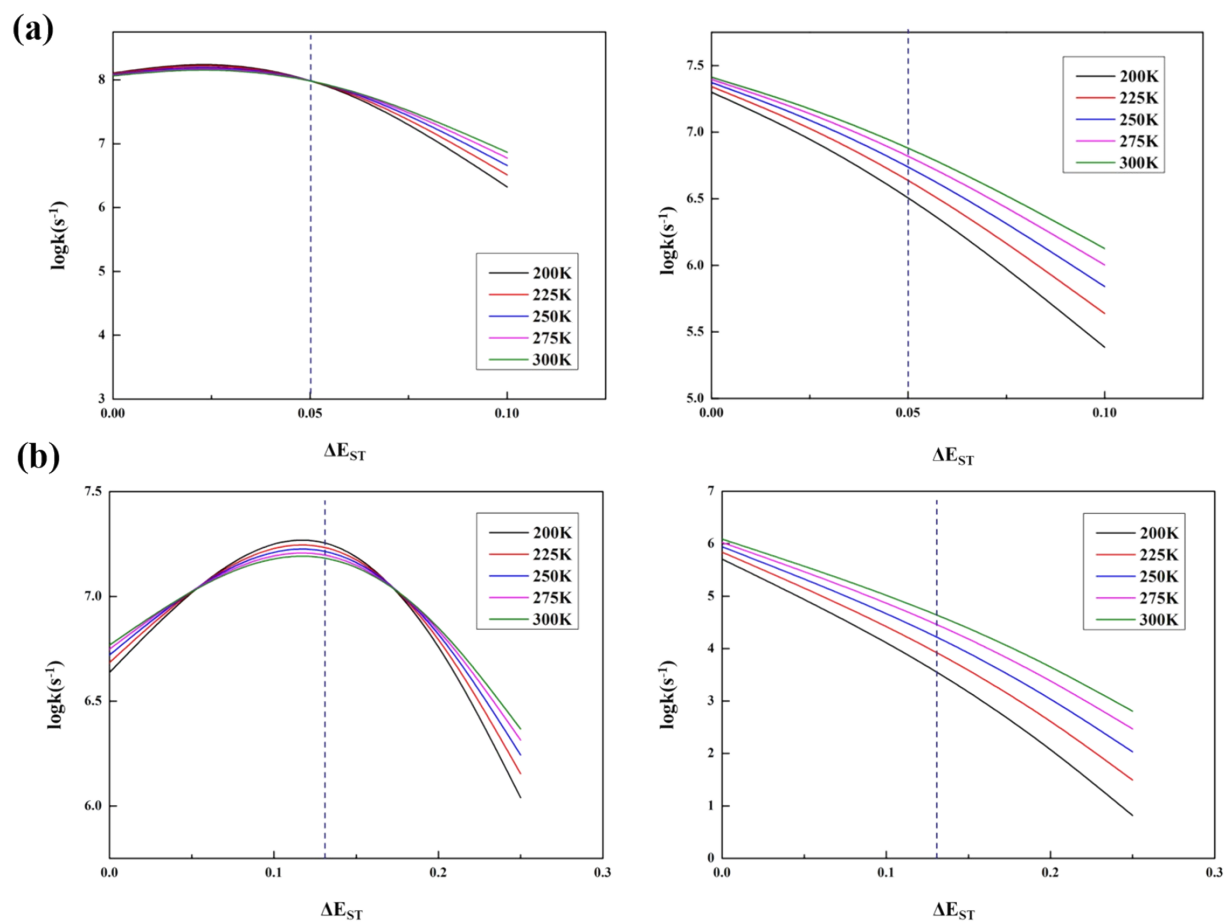

**Figure S15.** ISC rate constants and RISC rate constants as a function of the energy gap for NAI-DPAC (a) and NAI-DMAC (b) of different temperature in toluene.



**Table S1.** Geometry parameters of  $S_0$ ,  $S_1$  and  $T_1$  states for NAI-R3 as well as their differences ( $\Delta$ ). (Bond length: Å. Bond angle: °. Dihedral angle: °.)

|                       | <b>Geometry</b> | <b>Atomic number</b> | <b><math>S_0</math></b> | <b><math>S_1</math></b> | <b><math>T_1</math></b> | <b><math>\Delta S_0 - S_1 </math></b> | <b><math>\Delta S_1 - T_1 </math></b> |
|-----------------------|-----------------|----------------------|-------------------------|-------------------------|-------------------------|---------------------------------------|---------------------------------------|
| <b>Bond length</b>    | $B_1$           | 2-28                 | 1.439                   | 1.435                   | 1.437                   | 0.004                                 | 0.002                                 |
|                       | $B_2$           | 19-50                | 1.426                   | 1.437                   | 1.410                   | 0.011                                 | 0.027                                 |
|                       | $B_3$           | 44-69                | 1.488                   | 1.480                   | 1.486                   | 0.008                                 | 0.006                                 |
|                       | $B_4$           | 48-59                | 1.488                   | 1.480                   | 1.487                   | 0.008                                 | 0.006                                 |
| <b>Bond angle</b>     | $\theta_1$      | 2-28-27              | 117.5                   | 117.2                   | 117.7                   | 0.3                                   | 0.5                                   |
|                       | $\theta_2$      | 13-19-50             | 119.0                   | 118.0                   | 121.4                   | 1.1                                   | 3.4                                   |
|                       | $\theta_3$      | 44-69-71             | 121.3                   | 121.3                   | 120.9                   | 0.04                                  | 0.4                                   |
|                       | $\theta_4$      | 41-48-59             | 121.3                   | 121.0                   | 121.2                   | 0.3                                   | 0.2                                   |
| <b>Dihedral angle</b> | $\alpha_1$      | 3-2-28-27            | 62.6                    | 59.6                    | 60.9                    | 3.1                                   | 0.7                                   |
|                       | $\alpha_2$      | 23-19-50-32          | 101.8                   | 88.7                    | 68.4                    | 13.1                                  | 20.3                                  |
|                       | $\alpha_3$      | 72-76-92-98          | 119.8                   | 59.1                    | 119.7                   | 60.0                                  | 59.7                                  |
|                       | $\alpha_4$      | 62-66-93-114         | 71.9                    | 125.6                   | 71.7                    | 53.7                                  | 53.9                                  |

**Table S2.** Geometry parameters of  $S_0$ ,  $S_1$  and  $T_1$  states for NAI-DPAC as well as their differences ( $\Delta$ ). (Bond length: Å. Bond angle: °. Dihedral angle: °.)

|                       | <b>Geometry</b> | <b>Atomic number</b> | <b><math>S_0</math></b> | <b><math>S_1</math></b> | <b><math>T_1</math></b> | <b><math>\Delta S_0 - S_1 </math></b> | <b><math>\Delta S_1 - T_1 </math></b> |
|-----------------------|-----------------|----------------------|-------------------------|-------------------------|-------------------------|---------------------------------------|---------------------------------------|
| <b>Bond length</b>    | $B_1$           | 2-28                 | 1.439                   | 1.435                   | 1.438                   | 0.004                                 | 0.003                                 |
|                       | $B_2$           | 19-50                | 1.424                   | 1.436                   | 1.413                   | 0.012                                 | 0.023                                 |
|                       | $B_3$           | 38-77                | 1.562                   | 1.567                   | 1.562                   | 0.005                                 | 0.004                                 |
|                       | $B_4$           | 38-66                | 1.537                   | 1.543                   | 1.538                   | 0.006                                 | 0.006                                 |
| <b>Bond angle</b>     | $\theta_1$      | 1-2-28               | 119.8                   | 120.3                   | 119.9                   | 0.4                                   | 0.4                                   |
|                       | $\theta_2$      | 13-19-50             | 120.2                   | 118.7                   | 122.0                   | 1.4                                   | 3.2                                   |
|                       | $\theta_3$      | 41-35-38             | 124.6                   | 122.4                   | 124.9                   | 2.2                                   | 2.5                                   |
|                       | $\theta_4$      | 78-77-38             | 120.7                   | 118.8                   | 119.5                   | 1.9                                   | 0.7                                   |
| <b>Dihedral angle</b> | $\alpha_1$      | 3-2-28-27            | 63.1                    | 59.8                    | 60.1                    | 3.3                                   | 0.3                                   |
|                       | $\alpha_2$      | 13-19-50-32          | 92.1                    | 86.0                    | 110.5                   | 6.1                                   | 24.5                                  |
|                       | $\alpha_3$      | 35-38-77-78          | 148.4                   | 129.0                   | 142.4                   | 19.4                                  | 13.4                                  |
|                       | $\alpha_4$      | 35-38-77-79          | 113.6                   | 117.4                   | 134.3                   | 3.8                                   | 16.9                                  |

**Table S3.** Geometry parameters of  $S_0$ ,  $S_1$  and  $T_1$  states for NAI-DMAC as well as their differences ( $\Delta$ ). (Bond length: Å. Bond angle: °. Dihedral angle: °.)

|                       | <b>Geometry</b> | <b>Atomic number</b> | <b><math>S_0</math></b> | <b><math>S_1</math></b> | <b><math>T_1</math></b> | <b><math>\Delta S_0 - S_1 </math></b> | <b><math>\Delta S_1 - T_1 </math></b> |
|-----------------------|-----------------|----------------------|-------------------------|-------------------------|-------------------------|---------------------------------------|---------------------------------------|
| <b>Bond length</b>    | $B_1$           | 2-28                 | 1.439                   | 1.435                   | 1.438                   | 0.004                                 | 0.002                                 |
|                       | $B_2$           | 19-50                | 1.426                   | 1.436                   | 1.409                   | 0.010                                 | 0.026                                 |
|                       | $B_3$           | 5-59                 | 1.539                   | 1.540                   | 1.539                   | 0.0003                                | 0.0002                                |
|                       | $B_4$           | 20-22                | 1.384                   | 1.420                   | 1.448                   | 0.036                                 | 0.272                                 |
|                       | $B_5$           | 19-23                | 1.382                   | 1.413                   | 1.455                   | 0.031                                 | 0.042                                 |
|                       | $B_6$           | 15-16                | 1.384                   | 1.413                   | 1.434                   | 0.029                                 | 0.021                                 |
| <b>Bond angle</b>     | $\theta_1$      | 3-2-28               | 119.9                   | 120.2                   | 120.1                   | 0.3                                   | 0.2                                   |
|                       | $\theta_2$      | 13-19-50             | 119.2                   | 118.0                   | 121.4                   | 1.2                                   | 3.4                                   |
|                       | $\theta_3$      | 59-5-6               | 123.0                   | 123.0                   | 123.0                   | 0.1                                   | 0.05                                  |
|                       | $\theta_4$      | 55-38-51             | 109.3                   | 109.5                   | 109.4                   | 0.2                                   | 0.1                                   |
| <b>Dihedral angle</b> | $\alpha_1$      | 3-2-28-27            | 63.1                    | 60.8                    | 61.4                    | 2.3                                   | 0.7                                   |
|                       | $\alpha_2$      | 23-19-50-31          | 94.2                    | 91.2                    | 112.8                   | 3.0                                   | 21.6                                  |

**Table S4.** Geometry parameters of  $S_0$ ,  $S_1$  and  $T_1$  states for BTDMac-NAI as well as their differences ( $\Delta$ ). (Bond length: Å. Bond angle: °. Dihedral angle: °.)

|                       | <b>Geometry</b> | <b>Atomic number</b> | <b><math>S_0</math></b> | <b><math>S_1</math></b> | <b><math>T_1</math></b> | <b><math>\Delta S_0 - S_1 </math></b> | <b><math>\Delta S_1 - T_1 </math></b> |
|-----------------------|-----------------|----------------------|-------------------------|-------------------------|-------------------------|---------------------------------------|---------------------------------------|
| <b>Bond length</b>    | $B_1$           | 2-28                 | 1.439                   | 1.436                   | 1.438                   | 0.003                                 | 0.002                                 |
|                       | $B_2$           | 19-48                | 1.428                   | 1.431                   | 1.411                   | 0.003                                 | 0.020                                 |
|                       | $B_3$           | 72-73                | 1.774                   | 1.773                   | 1.775                   | 0.002                                 | 0.003                                 |
|                       | $B_4$           | 20-22                | 1.384                   | 1.384                   | 1.384                   | 0                                     | 0                                     |
|                       | $B_5$           | 19-23                | 1.383                   | 1.416                   | 1.456                   | 0.033                                 | 0.04                                  |
|                       | $B_6$           | 15-16                | 1.384                   | 1.412                   | 1.437                   | 0.028                                 | 0.025                                 |
| <b>Bond angle</b>     | $\theta_1$      | 1-2-28               | 119.9                   | 120.2                   | 120.0                   | 0.3                                   | 0.1                                   |
|                       | $\theta_2$      | 13-19-48             | 119.0                   | 117.9                   | 120.3                   | 1.1                                   | 2.4                                   |
|                       | $\theta_3$      | 34-72-73             | 91.3                    | 91.4                    | 91.3                    | 0.2                                   | 0.2                                   |
|                       | $\theta_4$      | 38-33-37             | 117.4                   | 118.2                   | 117.7                   | 0.8                                   | 0.5                                   |
| <b>Dihedral angle</b> | $\alpha_1$      | 1-2-28-26            | 62.5                    | 59.9                    | 60.5                    | 2.5                                   | 0.6                                   |
|                       | $\alpha_2$      | 13-19-48-32          | 88.8                    | 88.2                    | 108.9                   | 0.7                                   | 20.7                                  |

**Table S5.** Geometry parameters of  $S_0$ ,  $S_1$  and  $T_1$  states for BFDMAc-NAI as well as their differences ( $\Delta$ ). (Bond length: Å. Bond angle: °. Dihedral angle: °.)

|                       | <b>Geometry</b> | <b>Atomic number</b> | <b><math>S_0</math></b> | <b><math>S_1</math></b> | <b><math>T_1</math></b> | <b><math>\Delta S_0 - S_1 </math></b> | <b><math>\Delta S_1 - T_1 </math></b> |
|-----------------------|-----------------|----------------------|-------------------------|-------------------------|-------------------------|---------------------------------------|---------------------------------------|
| <b>Bond length</b>    | $B_1$           | 2-28                 | 1.439                   | 1.435                   | 1.438                   | 0.004                                 | 0.003                                 |
|                       | $B_2$           | 19-48                | 1.429                   | 1.434                   | 1.411                   | 0.005                                 | 0.024                                 |
|                       | $B_3$           | 82-34                | 1.368                   | 1.344                   | 1.363                   | 0.024                                 | 0.019                                 |
|                       | $B_4$           | 20-22                | 1.384                   | 1.421                   | 1.450                   | 0.037                                 | 0.029                                 |
|                       | $B_5$           | 19-23                | 1.380                   | 1.410                   | 1.454                   | 0.030                                 | 0.044                                 |
|                       | $B_6$           | 15-16                | 1.385                   | 1.141                   | 1.436                   | 0.244                                 | 0.295                                 |
| <b>Bond angle</b>     | $\theta_1$      | 1-2-28               | 119.8                   | 120.3                   | 120.0                   | 0.5                                   | 0.2                                   |
|                       | $\theta_2$      | 13-19-48             | 118.8                   | 117.7                   | 120.3                   | 1.2                                   | 2.6                                   |
|                       | $\theta_3$      | 28-26-15             | 116.8                   | 116.4                   | 117.0                   | 0.4                                   | 0.6                                   |
|                       | $\theta_4$      | 72-82-34             | 107.1                   | 107.7                   | 107.1                   | 0.6                                   | 0.6                                   |
| <b>Dihedral angle</b> | $\alpha_1$      | 3-2-28-27            | 62.2                    | 59.4                    | 59.9                    | 2.7                                   | 0.5                                   |
|                       | $\alpha_2$      | 13-19-48-32          | 88.0                    | 91.7                    | 114.1                   | 3.8                                   | 22.3                                  |

**Table S6.** Calculated radiative and non-radiative rates ( $s^{-1}$ ) from  $S_1$  to  $S_0$ , the SOC constants ( $cm^{-1}$ ), the ISC and RISC rates ( $s^{-1}$ ) as well as the energy gap  $\Delta E_{st}$  (eV) between  $S_1$  and  $T_1$ .

|                   | $\Delta E_{st}$ | SOC   | $K_r$             | $K_{nr}$             | ISC               | RISC              |
|-------------------|-----------------|-------|-------------------|----------------------|-------------------|-------------------|
| <b>NAI-R2</b>     | 0.05            | 0.024 | $3.7 \times 10^4$ | $8.3 \times 10^9$    | $7.4 \times 10^5$ | $3.5 \times 10^4$ |
| <b>NAI-R3</b>     | 0.04            | 0.029 | $1.1 \times 10^5$ | $7.9 \times 10^{10}$ | $1.2 \times 10^6$ | $1.2 \times 10^5$ |
| <b>NAI-DPAC</b>   | 0.21            | 0.532 | $0.3 \times 10^5$ | $7.2 \times 10^9$    | $1.7 \times 10^8$ | $3.7 \times 10^4$ |
| <b>NAI-DMAC</b>   | 0.09            | 0.023 | $2.0 \times 10^4$ | $3.5 \times 10^6$    | $4.9 \times 10^5$ | $4.9 \times 10^3$ |
| <b>BTDMac-NAI</b> | 0.06            | 0.281 | $1.6 \times 10^5$ | $1.4 \times 10^7$    | $7.0 \times 10^7$ | $5.7 \times 10^6$ |
| <b>BFDMac-NAI</b> | 0.13            | 0.143 | $1.7 \times 10^5$ | $7.0 \times 10^6$    | $1.5 \times 10^7$ | $4.5 \times 10^4$ |
